# Supplementary material for: Toxoplasma gondii Chromodomain Protein 1 Binds to Heterochromatin and Colocalises with Centromeres and Telomeres at the Nuclear Periphery
Source: PLoS One. 2012 Mar 9;7(3):e32671. doi: 10.1371/journal.pone.0032671 (PMC3302879; doi:10.1371/journal.pone.0032671)
Supplement: Table S1 — Primer used in this study. (XLS) [file pone.0032671.s008.xls]

## Sheet: Feuil1
Primer name	sequence	used for	Comments
chrIA - TgChromo1 neg F	CGAGGAGCCTGATGGTACAGTTATC	ChIP verification
chrIA - TgChromo1 neg R	CAGAAGTGGAGTGAAAGGAGCAAC	ChIP verification
chrIA - TgChromo1 pos F	ATCCGCCGAGGACTGCTTTG	ChIP verification
chrIA - TgChromo1 pos R	TCCGAATGAGTTGGGCTGTAAGG	ChIP verification
chrVIII - TgChromo1 neg F	ACAGTTTTTGTGGGCAGAGC	ChIP verification
chrVIII - TgChromo1 neg R	AGCGAAACCGACATACAACC	ChIP verification
chrVIII - TgChromo1 pos F	GCCAATCAAGTTGTCACCTG	ChIP verification
chrVIII - TgChromo1 pos R	AGATTTGCCTGTTGGGTGAG	ChIP verification
chrXI - TgChromo1 neg F	CCTATCCAAACGCTGAAAGC	ChIP verification
chrXI - TgChromo1 neg R	AGCGATCCCATAAACAGGTG	ChIP verification
chrXI - TgChromo1 pos F	TCCTTGGACCACATCTTTCC	ChIP verification
chrXI - TgChromo1 pos R	TCTCCACATCGACTGAATGC	ChIP verification
ENO1 F	AGGAAGCCCCTCATTCACTGG	ChIP verification
ENO1 R	ACGCCGTGTTGGACAGATCG	ChIP verification
ENO2 F	TTAGCCTCTGAGAGACCCATACG	ChIP verification
ENO2 R	GCCTTGTTGAATGTGGCTCTTCC	ChIP verification
ChrIaTR F	GCAAAAAAGCGCAACAACA	FISH probe	Telomeric repeats chrIa
ChrIaTR R	GTTTCTTTATTTCCGTCACGCA	FISH probe	Telomeric repeats chrIa
Repeats chrIX F	CGACAGAAAGGGAGCAAGAG	FISH probe	Pericentromeric sequence chrIX
Repeats chrIX R	CATGGTTTGCACTTTTGTGG	FISH probe	Pericentromeric sequence chrIX
Repeats IV F	GAGACCGCGGAGCCGAAGT	FISH probe	Pericentromeric sequence chrIV
Repeats IV R	TCCTACGCCTCCTCCTCCC	FISH probe	Pericentromeric sequence chrIV
Repeats IX TR F	gatatgcgattcgtcgagtg	FISH probe	Telomeric repeats chrIX
Repeats IX TR R	aattcgtgccgagtgatgtc	FISH probe	Telomeric repeats chrIX
TgChromo1IP-1F	TACTTCCAATCCAATTTAATGCGCGCCGAAACAATTCAAC	Knock-in	TGGT1_043740
TgChromo1IP-1R	TCCTCCACTTCCAATTTTAGCGTACCACTGTTTCGTGTCCG	Knock-in	TGGT1_043740
TgChromo1IP-2F	TACTTCCAATCCAATTTAATGCTCCATTTGTTCCTGACACATGG	Knock-in	TGGT1_089780
TgChromo1IP-2R	TCCTCCACTTCCAATTTTAGCGCAGCACGCTCGACTTGG	Knock-in	TGGT1_089780
TgChromo1IP-3F	TACTTCCAATCCAATTTAATGCTTCAGGGCTGATTCTGGTTC	Knock-in	TGGT1_089230
TgChromo1IP-3R	TCCTCCACTTCCAATTTTAGCTGTGTAAATTGCTTCGTCAATCT	Knock-in	TGGT1_089230
TgChromo1KI F	TACTTCCAATCCAATTTAATGCGCAGGTGGAGACGGGATC	Knock-in	TgChromo1
TgChromo1KI R	TCCTCCACTTCCAATTTTAGCGCCAGCGACACAAGAGAAC	Knock-in	TgChromo1
HA9 Rev	CAGCGTAGTCCGGGAC	PCR Screen of Knock-in
TgChromo1 F	GGATCCATGGCGAAAGAACGAGGG	Recombinant protein	Cloned in pGex6P3
TgChromo1 R	GAATTCGCCAGCGACACAAGAGAAC	Recombinant protein	Cloned in pGex6P3
